# Supplementary material for: Modulation of interfacial charge transfer by self-assembly of single-layer graphene enwrapped one-dimensional semiconductors toward photoredox catalysis
Source: Royal Society of Chemistry journal article supplement (doi:10.1039/c7ta08415c), 2017-01-01
Supplement: c7ta08415c1.pdf [file c7ta08415c1.pdf]

## Supporting information

# **Modulation of Interfacial Charge Transfer by Self-assembly of Single-layer Graphene Enwrapped One-dimensional Semiconductors Toward Photoredox Catalysis**

*Junyu Zhang, Fang-Xing Xiao\**

College of Materials Science and Engineering, Fuzhou University, Fuzhou, 350002, People's Republic of China. \*Email: fangxing2010@gmail.com

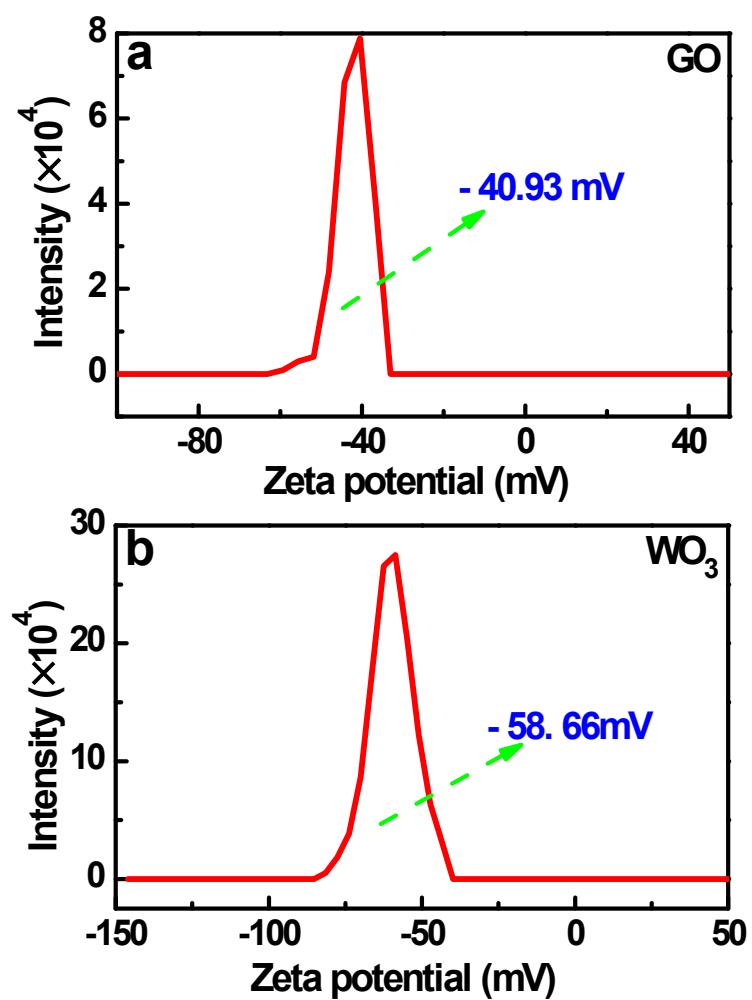

**Fig. S1.** Zeta potentials of (a) GO and (b) WO<sub>3</sub> NRs aqueous solutions.

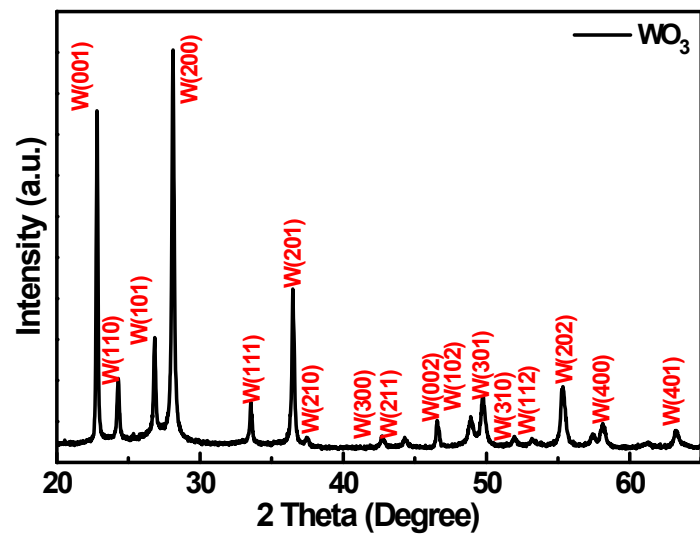

Fig. S2. XRD pattern of pristine WO<sub>3</sub> NRs.

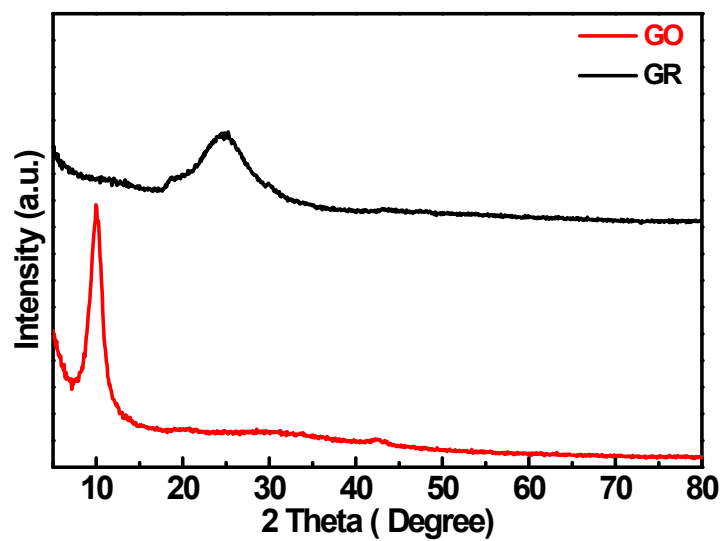

Fig. S3. XRD patterns of GO and GR.

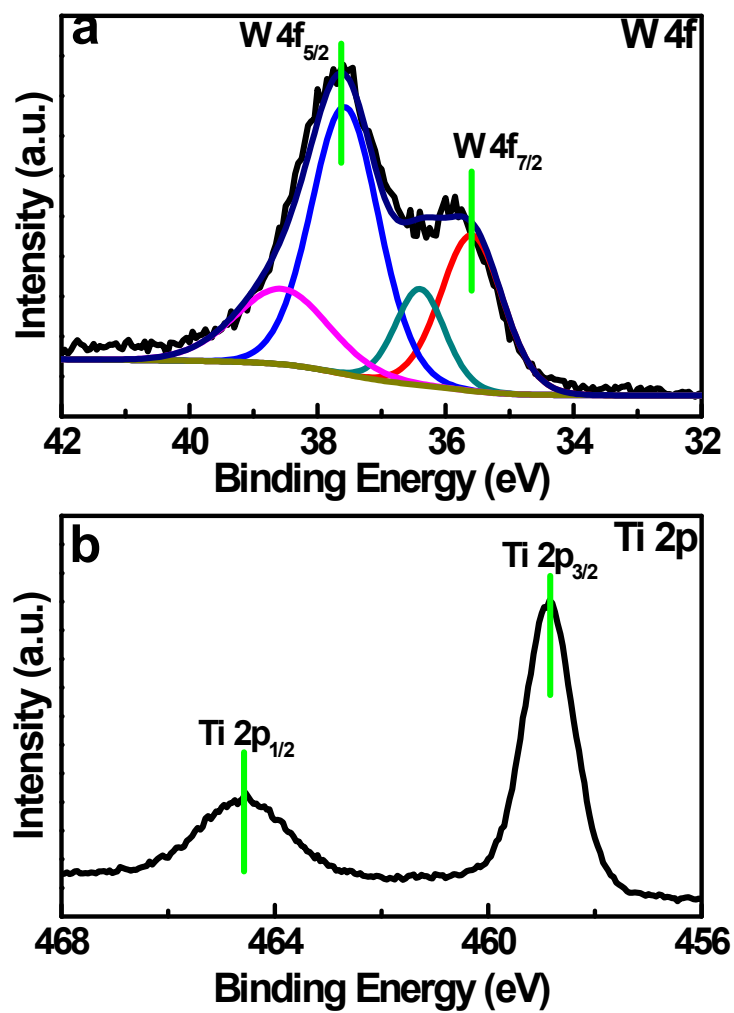

**Fig. S4.** High-resolution XPS spectra of (a) W 4f and (b) Ti 2p for pristine  $WO_3$  NRs and TNBs, respectively.

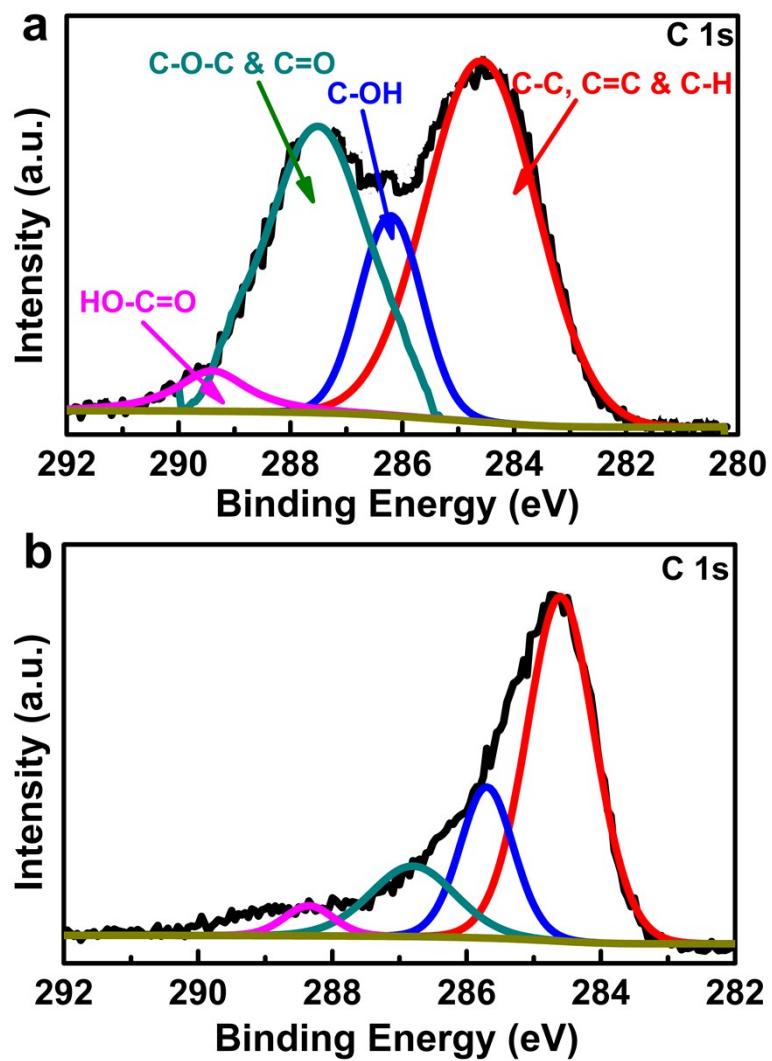

**Fig. S5.** High-resolution C 1s spectra of (a) GO and (b) TNBs/WO<sub>3</sub> NRs/GR ternary heterostructure.

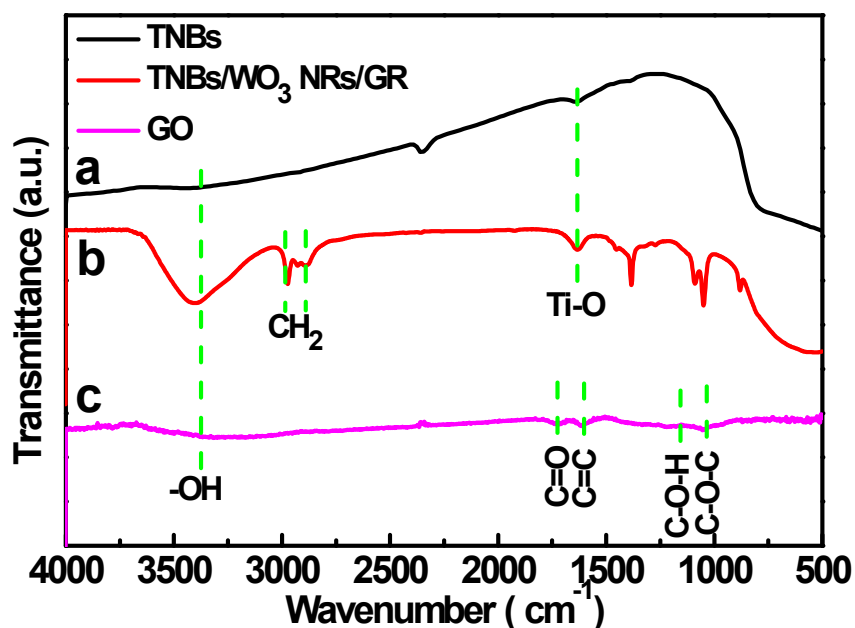

**Fig. S6.** FTIR spectra of (a) TNBs, (b) TNBs/WO<sub>3</sub> NRs/GR and (c) GO.

**Note:** GO displays several characteristic bands at 1730, 1633, 1401, 1226, and 1058 cm<sup>-1</sup>. Specifically, the carboxyl group appears at 1730 cm<sup>-1</sup> (*i.e.*, C=O stretching vibration)<sup>1</sup> along with the presence of C-O vibration of epoxy groups at 1058 and 857 cm<sup>-1</sup>.<sup>2</sup> The hydroxyl group (-OH) is located at ca. 3400 and 1401 cm<sup>-1</sup>, the epoxy group (C-O-C) at 1226 cm<sup>-1</sup>, and the alkoxy group (C-OH & C-O) at 1050 cm<sup>-1</sup>.<sup>3</sup> The peak located at 1633 cm<sup>-1</sup> is associated with the aromatic C=C bond in GO.<sup>4-5</sup>

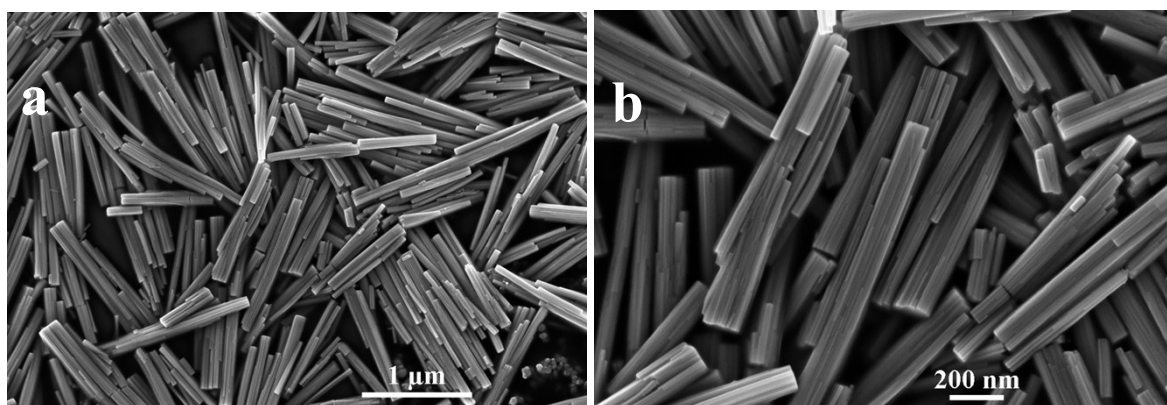

**Fig. S7.** (a) High and (b) low-magnified FESEM images of WO<sub>3</sub> NRs.

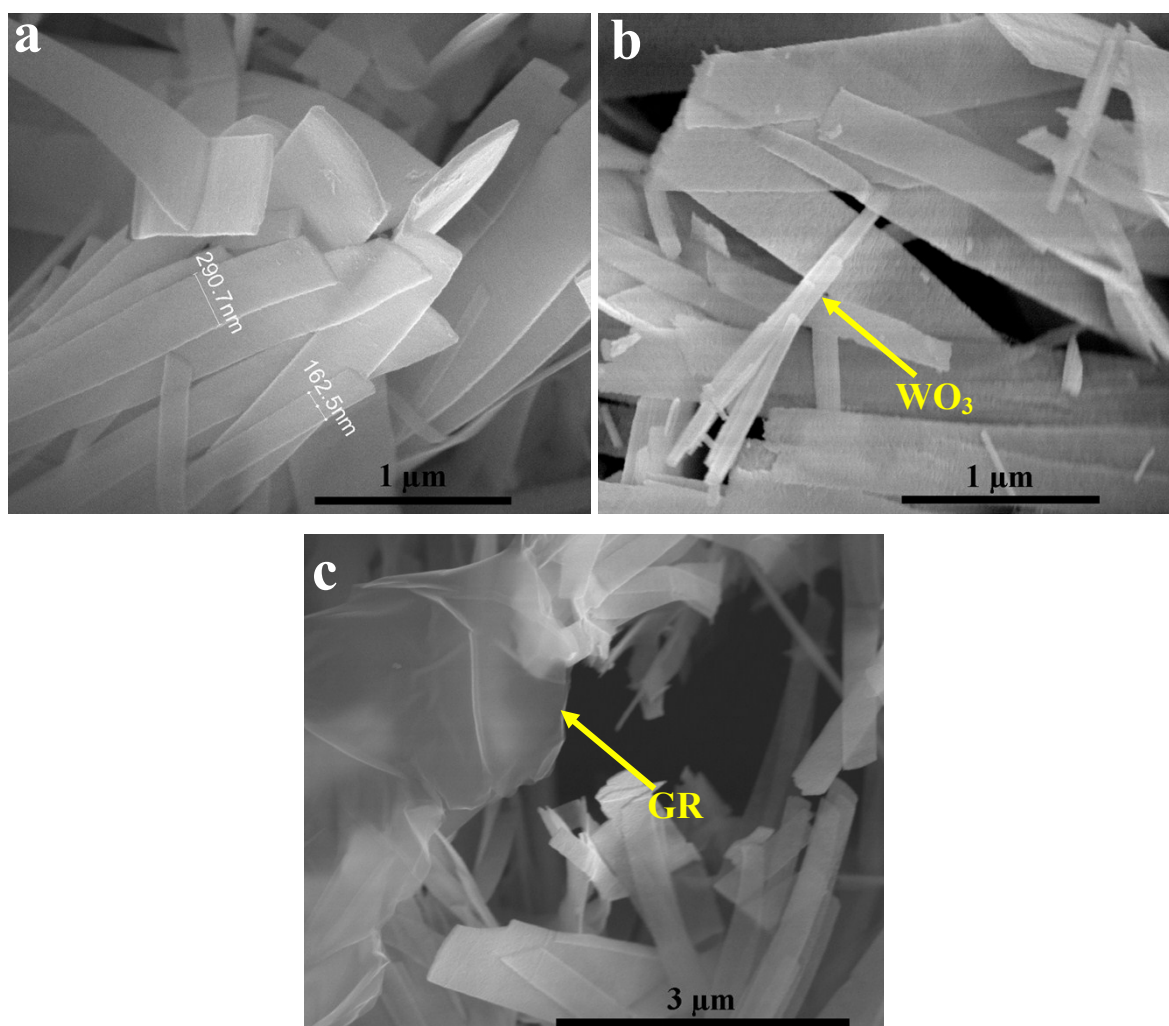

**Fig. S8.** High-magnified FESEM images of (a) TNBs matrix, (b) TNBs/WO<sub>3</sub> NRs and (c) TNBs/GR binary heterostructures.

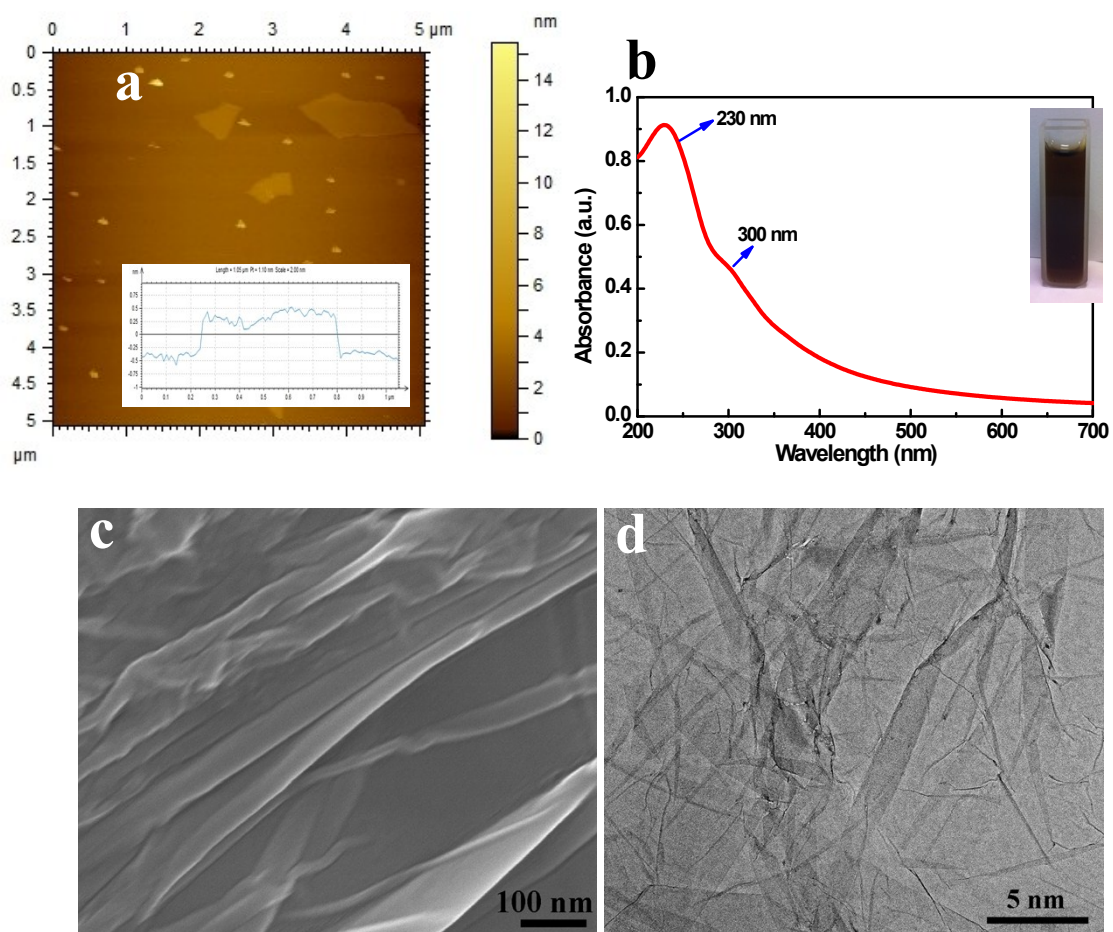

**Fig. S9.** (a) AFM image of GO with corresponding height profile in the inset and (b) UV-absorption spectrum of GO aqueous solution with photograph in the inset, (c) FESEM and (d) TEM images of GO.

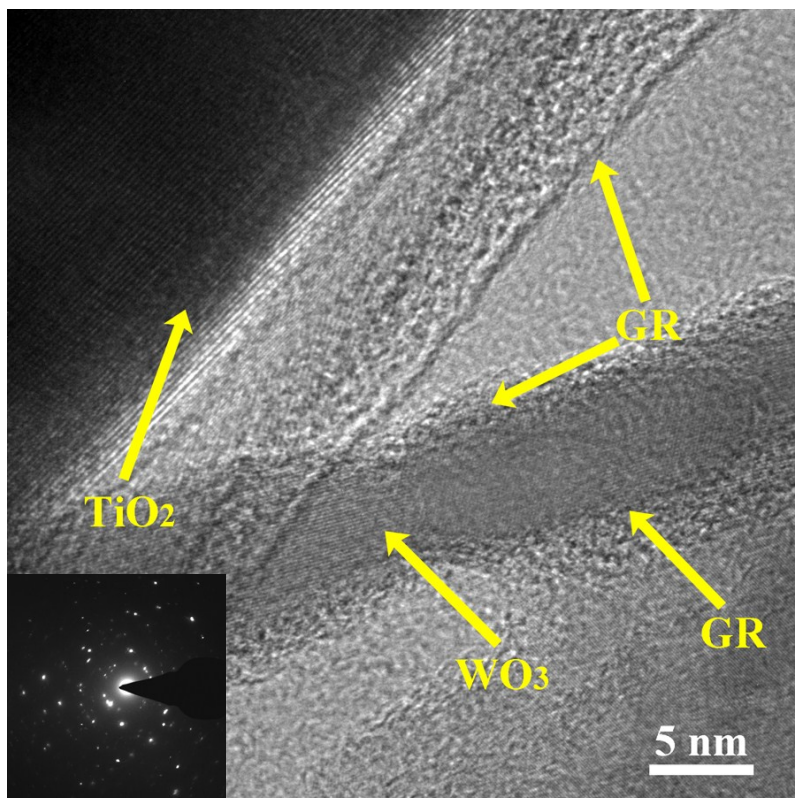

**Fig. S10.** HRTEM image of TNBs/ $\text{WO}_3$  NRs/GR ternary heterostructure with corresponding SAED pattern in the inset.

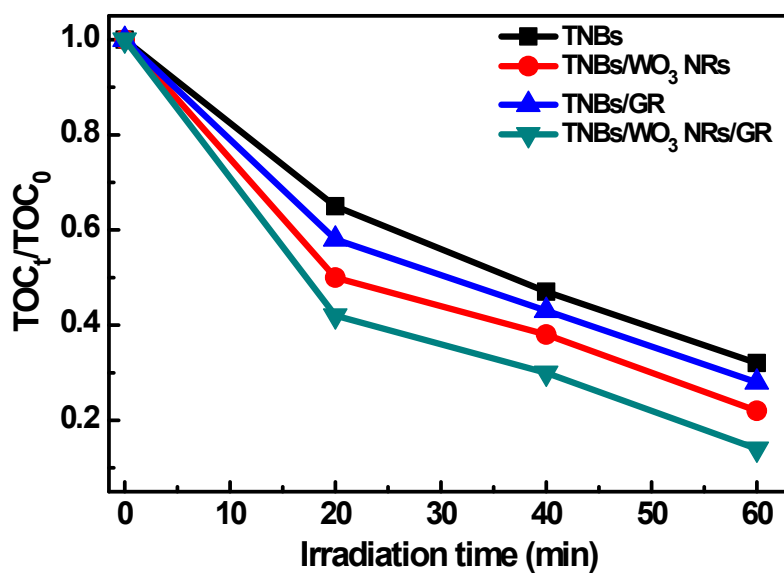

**Fig. S11.** Variations of TOC percentage as function of irradiation time over different catalysts.

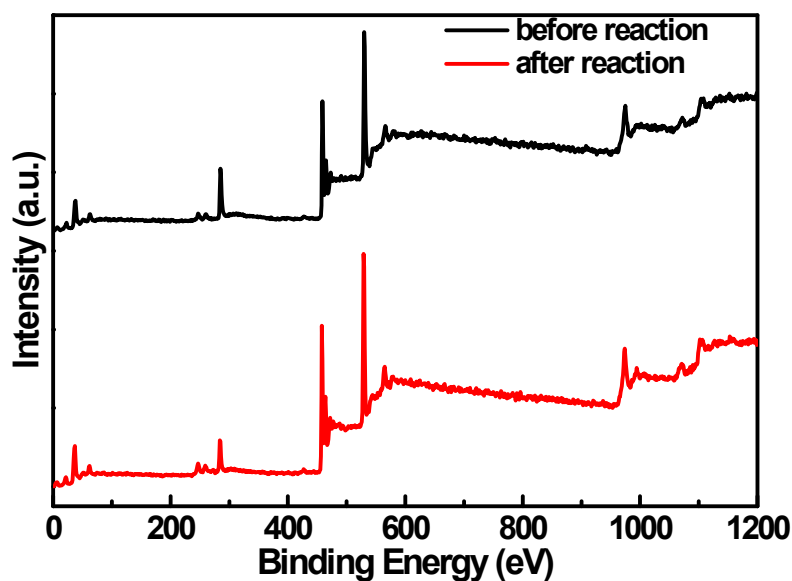

**Fig. S12.** Survey XPS spectra of TNBs/WO<sub>3</sub> NRs/GR ternary heterostructure before and after cyclic reactions.

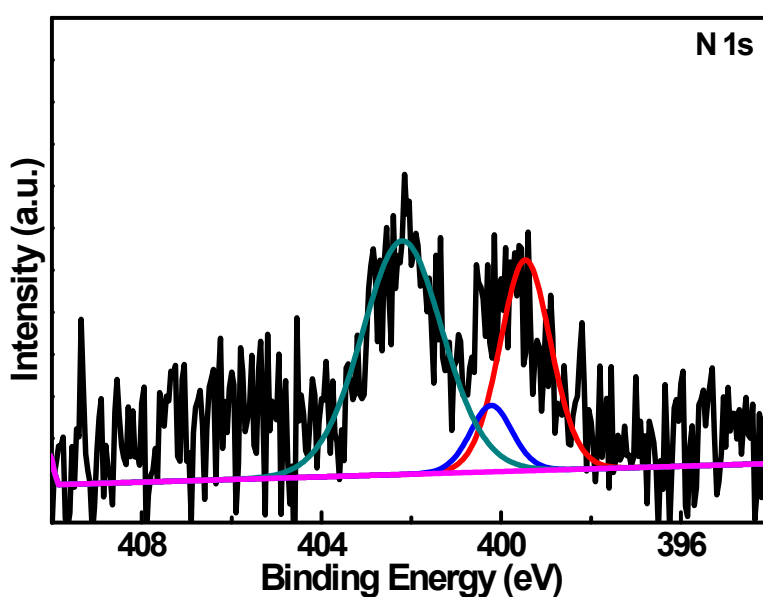

**Fig. S13.** High-resolution N 1s spectrum of TNBs/WO<sub>3</sub> NRs/GR ternary heterostructure after cyclic reactions.

**Note:** It is apparent that peak intensity of high-resolution N 1s spectrum of TNBs/WO<sub>3</sub> NRs/GR ternary heterostructure is still rather weak and comparable to that of before cyclic reaction, indicating PDDA layer intercalated within the interfacial region of TNBs and WO<sub>3</sub> NRs was not removed during the photocatalytic reaction and this is beneficial for retaining the structural integrity of the ternary heterostructure.

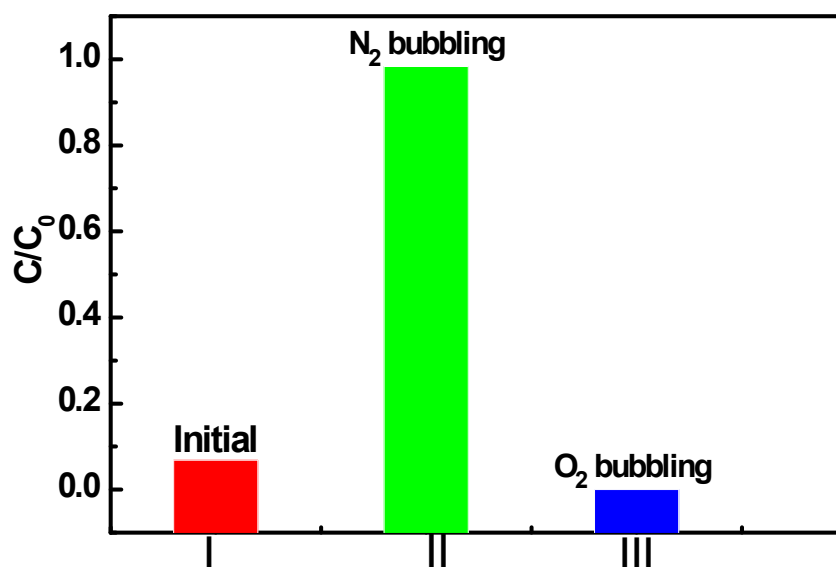

**Fig. S14.** Control experiments by bubbling N<sub>2</sub> and O<sub>2</sub> gas into the reaction system toward the photocatalytic degradation of RhB over TNBs/WO<sub>3</sub> NRs/GR ternary heterostructure with the same irradiation time of 60 min.

## ***Experimental section***

### **Synthesis of Graphene Oxide (GO)**

GO nanosheets were synthesized from crystalline graphite nanosheets powder (99.5 %) using a modified Hummers method.<sup>6,7</sup> In a typical synthesis, 10 g of graphite powder was added to 230 mL of concentrated H<sub>2</sub>SO<sub>4</sub> (98 %) which was cooled in an ice bath. Following, 30 g of KMnO<sub>4</sub> was added slowly to the above solution with gentle stirring for 10 min. Temperature of the mixed solution was then raised to 35 °C and kept for 2 h to completely oxidize graphite. Afterwards, the mixture was diluted with 460 mL of DI H<sub>2</sub>O and further diluted by 1.4 L of DI H<sub>2</sub>O 5 min later under vigorous stirring. 50 mL of H<sub>2</sub>O<sub>2</sub> was then added to the mixture and a brilliant yellow product was formed along with bubbling. The mixture was filtered and washed by 1 : 10 HCl aqueous solution to remove metal ions and by DI H<sub>2</sub>O to remove residual acid. The filter cake thus-obtained was dispersed in DI H<sub>2</sub>O with a mechanical agitation and centrifuged at 4500 rpm for 2 min and 5 cycles to remove small GO pieces and water-soluble byproducts. The final sediment was dialyzed for two-

weeks to remove impurity atoms and then re-dispersed in DI H<sub>2</sub>O with mechanical agitation or mild sonication to result in exfoliated GO aqueous solution.

## References

- 1 D. Yu and L. Dai, *J. Phys. Chem. Lett.*, 2010, **1**, 467-470.
- 2 H. Yang, F. Li, C. Shan, D. Han, Q. Zhang, L. Niu and A. Ivaska *J. Mater. Chem.*, 2009, **19**, 4632-4638.
- 3 J. L. Zhang, H. J. Yang, G. X. Shen, P. Cheng, J. Y. Zhang and S. W. Guo, *Chem. Commun.*, 2010, **46**, 1112-1114.
- 4 H. P. Cong, X. C. Ren, P. Wang and S. H. Yu, *ACS Nano*, 2012, **6**, 2693-2703.
- 5 G. I. Titelman, V. Gelman,; S. Bron, R. L. Khalfin, Y. Cohen and H. Bianco-Peled, *Carbon*, 2005, **43**, 641-649.
- 6 F. -X. Xiao, J. Miao and B. Liu, *J. Am. Chem. Soc.* 2014, **136**, 1559-1569.
- 7 W. S. Hummers and R. E. Offeman, *J. Am. Chem. Soc.*, 1958, **80**, 1339-1339.
